# Supplementary material for: Zn(H2C3N3O3)2·3H2O: the first single-d10transition metal based ultraviolet hydroisocyanurate crystal with large birefringence
Source: Royal Society of Chemistry journal article supplement (doi:10.1039/d1dt00793a), 2021-01-01
Supplement: d1dt00793a1.pdf [file d1dt00793a1.pdf]

## Supporting Information

Zn(H<sub>2</sub>C<sub>3</sub>N<sub>3</sub>O<sub>3</sub>)<sub>2</sub>·3H<sub>2</sub>O: the first single-*d*<sup>10</sup>  
transition metal based ultraviolet  
hydroisocyanurate crystal with large  
birefringence

Dandan Wang,<sup>a</sup> Xinyuan Zhang,<sup>\*,a</sup> Fei Liang,<sup>\*,b</sup> Zhanggui Hu<sup>a</sup> and Yicheng Wu<sup>a</sup>

<sup>a</sup> Tianjin Key Laboratory of Functional Crystal Materials, Institute of Functional Crystals, School of Materials Science and Engineering, Tianjin University of Technology, Tianjin 300384, China.

<sup>b</sup> State Key Laboratory of Crystal Materials and Institute of Crystal Materials, Shandong University, Jinan 250100, China.

## **Contents.**

**Table S1.** Fractional atomic coordinates ( $\times 10^4$ ) and equivalent isotropic displacement parameters ( $\text{\AA}^2 \times 10^3$ ) of **ZHCY**.

**Table S2.** Anisotropic displacement parameters ( $\text{\AA}^2 \times 10^3$ ) of **ZHCY**.

**Table S3.** Selected bond lengths [ $\text{\AA}$ ] of **ZHCY**.

**Table S4.** Hydrogen bond lengths [ $\text{\AA}$ ] of **ZHCY**.

**Table S5.** Selected bond angles ( $^\circ$ ) of **ZHCY**.

**Figure S1.** EDS analysis of **ZHCY**.

**Figure S2.** The TG and DSC curves (a) and PXRD patterns for the residual (b) of **ZHCY**.

**Figure S3.** The IR spectrum of **ZHCY**.

**Figure S4.** The Raman spectrum of **ZHCY**.

**Figure S5.** Band calculations of **ZHCY**. (a) phonon dispersion spectrum, (b) band structure, (c) partial density of states.

## 1. Supplementary Tables.

**Table S1.** Fractional atomic coordinates ( $\times 10^4$ ) and equivalent isotropic displacement parameters ( $\text{\AA}^2 \times 10^3$ ) of **ZHCY**.

| Atom | x         | y        | z         | $U_{(\text{eq})}^{\text{a}}$ |
|------|-----------|----------|-----------|------------------------------|
| Zn1  | 4998.6(6) | 831.5(4) | 7573.3(3) | 30.22(13)                    |
| O1   | 6416(4)   | 3405(3)  | 6374(2)   | 39.3(6)                      |
| O2   | 6673(4)   | 3297(2)  | 10267(2)  | 35.4(5)                      |
| O3   | 8775(4)   | 8028(2)  | 9608(2)   | 40.7(6)                      |
| O4   | 1370(4)   | 2660(2)  | 3657(2)   | 39.0(6)                      |
| O5   | 1020(4)   | 2675(3)  | 7480(2)   | 39.8(6)                      |
| O6   | 3710(4)   | 7320(2)  | 6842(2)   | 38.9(6)                      |
| O7   | 3200(5)   | 130(3)   | 5723(2)   | 51.2(7)                      |
| O8   | 2957(5)   | -75(4)   | 8410(3)   | 60.6(8)                      |
| O9   | 7617(5)   | 138(3)   | 7778(3)   | 54.8(7)                      |
| C1   | 6812(5)   | 4076(3)  | 7498(3)   | 26.3(6)                      |
| C2   | 6929(5)   | 4019(3)  | 9523(3)   | 26.2(6)                      |
| C3   | 8133(5)   | 6585(3)  | 9215(3)   | 29.0(6)                      |
| C4   | 1619(5)   | 3340(3)  | 4766(3)   | 28.5(6)                      |
| C5   | 1406(5)   | 3347(3)  | 6723(3)   | 29.0(6)                      |
| C6   | 2901(5)   | 5881(3)  | 6437(3)   | 26.7(6)                      |
| N1   | 6378(4)   | 3247(3)  | 8275(2)   | 25.0(5)                      |
| N2   | 7783(5)   | 5665(3)  | 9952(3)   | 29.6(6)                      |
| N3   | 7709(4)   | 5715(3)  | 7995(3)   | 29.4(6)                      |
| N4   | 1031(5)   | 2536(3)  | 5514(2)   | 36.6(7)                      |
| N5   | 2284(4)   | 4995(3)  | 7151(3)   | 28.5(6)                      |
| N6   | 2537(4)   | 4984(3)  | 5241(2)   | 27.4(5)                      |

<sup>a</sup> $U_{(\text{eq})}$  is defined as one-third of the trace of the orthogonalized  $U_{ij}$  tensor.

**Table S2.** Anisotropic displacement parameters ( $\text{\AA}^2 \times 10^3$ ) of **ZHCY**.

| Atom | $U_{11}$ | $U_{22}$  | $U_{33}$ | $U_{23}$ | $U_{13}$  | $U_{12}$ |
|------|----------|-----------|----------|----------|-----------|----------|
| Zn1  | 31.9(2)  | 23.13(19) | 30.4(2)  | 5.78(14) | 10.15(15) | 5.48(14) |
| O1   | 58.9(15) | 25.6(11)  | 21.7(11) | 4.8(9)   | 14.1(11)  | -0.2(10) |
| O2   | 55.7(14) | 25.0(11)  | 23.2(11) | 9.3(9)   | 15.7(10)  | 8.1(10)  |
| O3   | 60.4(15) | 19.8(11)  | 33.9(13) | 5.4(9)   | 15.3(11)  | 6.7(10)  |
| O4   | 63.7(15) | 22.7(11)  | 26.9(12) | 4.6(9)   | 22.8(11)  | 5.7(10)  |
| O5   | 59.8(15) | 26.2(11)  | 29.3(12) | 10.3(10) | 21.5(11)  | 1.8(11)  |
| O6   | 58.6(15) | 15(1)     | 35.7(13) | 3.3(9)   | 20.7(11)  | 2.1(10)  |
| O7   | 58.8(17) | 29.1(13)  | 41.7(15) | 9.9(11)  | -2.8(13)  | 2.5(12)  |
| O8   | 64.5(19) | 48.1(17)  | 63(2)    | 6.0(15)  | 35.3(16)  | 9.0(15)  |
| O9   | 49.8(16) | 38.5(15)  | 68(2)    | 10.0(14) | 17.2(14)  | 13.2(13) |
| C1   | 26.5(14) | 24.6(14)  | 23.3(15) | 7.4(12)  | 6.8(12)   | 4.5(11)  |
| C2   | 30.6(15) | 21.1(14)  | 25.2(15) | 5.7(11)  | 9.7(12)   | 8.9(12)  |
| C3   | 33.2(15) | 24.2(15)  | 26.5(15) | 7.4(12)  | 8.2(13)   | 9.0(12)  |
| C4   | 38.8(16) | 20.3(14)  | 24.6(15) | 6.6(12)  | 12.6(13)  | 7.1(12)  |
| C5   | 36.9(16) | 22.2(14)  | 25.6(15) | 7.2(12)  | 13.3(13)  | 5.4(12)  |
| C6   | 30.8(15) | 24.4(14)  | 24.1(15) | 7.0(12)  | 10.8(12)  | 8.5(12)  |
| N1   | 32.4(13) | 18.6(11)  | 19.0(12) | 4.6(9)   | 7.6(10)   | 4.7(10)  |
| N2   | 46.0(16) | 20.8(12)  | 18.4(13) | 4(1)     | 11.5(12)  | 8.4(11)  |
| N3   | 40.5(15) | 19.8(12)  | 25.5(14) | 9.4(11)  | 12.6(12)  | 4.5(11)  |
| N4   | 61.4(18) | 18.2(12)  | 26.5(14) | 5.5(10)  | 22.1(13)  | 3.4(12)  |
| N5   | 40.8(15) | 18.8(12)  | 22.2(13) | 3.6(10)  | 14.9(11)  | 3.6(10)  |
| N6   | 39.7(14) | 17.9(12)  | 25.6(13) | 8.6(10)  | 17.3(11)  | 4.7(10)  |

**Table S3.** Selected bond lengths [ $\text{\AA}$ ] of **ZHCY**.

| Bond   | Length/ $\text{\AA}$ |
|--------|----------------------|
| Zn1-N1 | 2.030                |
| Zn1-O7 | 2.006                |
| Zn1-O9 | 2.013                |
| Zn1-O8 | 2.028                |
| C1-O1  | 1.229                |
| C2-O2  | 1.233                |
| C3-O3  | 1.211                |
| C4-N4  | 1.240                |
| C5-O5  | 1.239                |
| C6-O6  | 1.209                |
| C1-N1  | 1.360                |
| C1-N3  | 1.377                |
| C2-N1  | 1.356                |
| C2-N2  | 1.380                |
| C3-N2  | 1.365                |
| C3-N3  | 1.366                |

**Table S4.** Hydrogen bond lengths [ $\text{\AA}$ ] of **ZHCY**.

| Hydrogen Bond     | Length/ $\text{\AA}$ |
|-------------------|----------------------|
| N2-H2 $\cdots$ O5 | 2.02                 |
| N3-H3 $\cdots$ O4 | 2.027                |
| N5-H5 $\cdots$ O2 | 2.036                |
| N6-H6 $\cdots$ O1 | 2.01                 |

**Table S5.** Selected bond angles (°) of **ZHCY**.

| Angle    | (°)   |
|----------|-------|
| C1-N1-C2 | 120.4 |
| C2-N2-C3 | 125.0 |
| C1-N3-C3 | 124.5 |
| C4-N4-C5 | 119.4 |
| C5-N5-C6 | 124.1 |
| C4-N6-C6 | 124.3 |
| N1-C1-N3 | 118.4 |
| N1-C2-N2 | 117.9 |
| N2-C3-N3 | 113.3 |
| N4-C4-N6 | 121.7 |
| N4-C5-N5 | 119.4 |
| N5-C6-N6 | 113.5 |

## 2. Supplementary Figures.

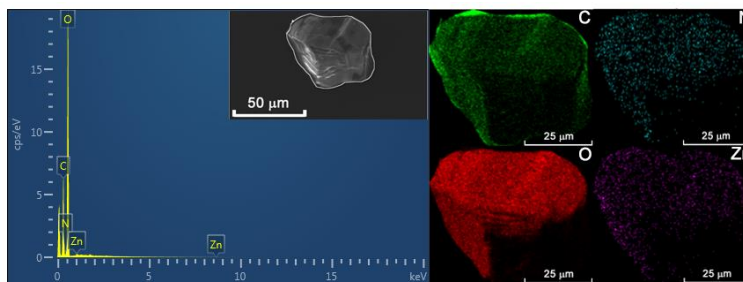

**Figure S1.** EDS analysis of ZHCY.



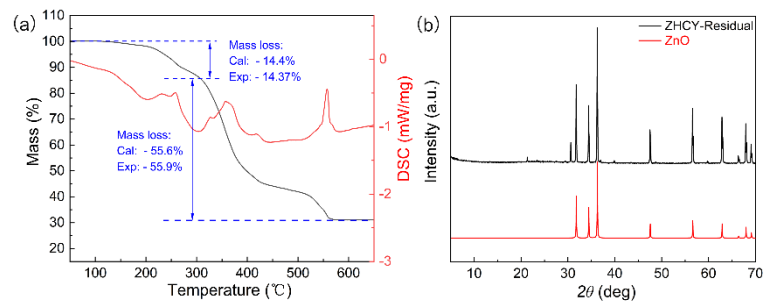

**Figure S2.** The TG and DSC curves (a) and PXRD patterns for the residual (b) of **ZHCY**.

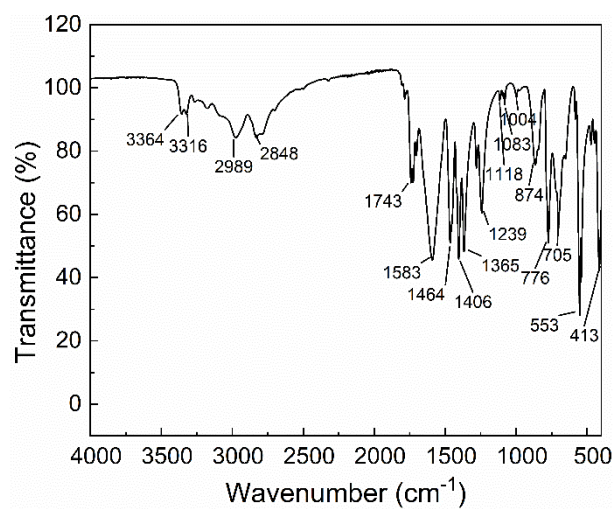

**Figure S3.** The IR spectrum of ZHCY.

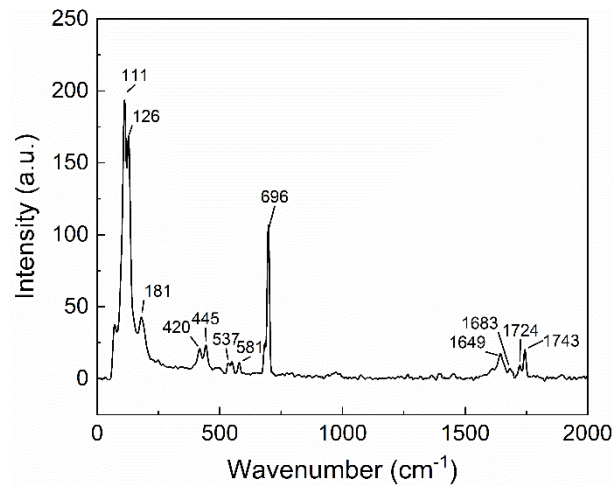

**Figure S4.** The Raman spectrum of ZHCY.

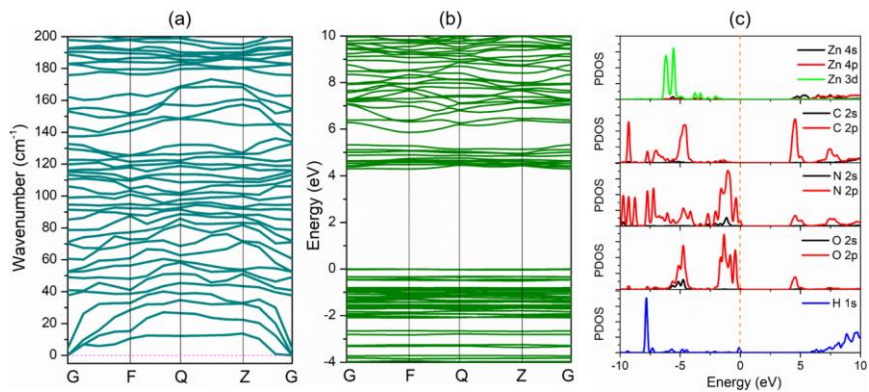

**Figure S5.** Band calculations of **ZHCY**. (a) phonon dispersion spectrum, (b) band structure, (c) partial density of states.
